# Supplementary material for: Linker dependent symmetry breaking charge separation in 9,10-bis(phenylethynyl)anthracene dimers
Source: Royal Society of Chemistry journal article supplement (doi:10.1039/d1qm01376a), 2022-01-01
Supplement: d1qm01376a1.pdf [file d1qm01376a1.pdf]

*Supporting Information for*

**Linker-Dependent Symmetry Breaking Charge Separation in 9,10-  
Bis(phenylethynyl)anthracene Dimers**

Pengkun Su, Heyuan Liu\*, Li Shen, Jun Zhou, Weijie Wang, Shanshan Liu, Xinyu Nie,

Zhi Li, Zhaobin Liu, Yanli Chen, Xiyu Li\*

**Content**

|                                                                                           |   |
|-------------------------------------------------------------------------------------------|---|
| 1. DFT-calculated ground state of <i>o-/m-/p-dimer</i> .....                              | 2 |
| 2. Fluorescence dynamic of <i>o-/m-/p-monomer</i> and <i>o-/m-/p-dimer</i> .....          | 3 |
| 3. Femtosecond transient absorption spectra of <i>o-/m-/p-monomer</i> in THF .....        | 4 |
| 4. Absorption spectra of dimer <sup>+</sup> and dimer <sup>-</sup> .....                  | 5 |
| 5. Single-wavelength dynamics of <i>o-dimer</i> , <i>m-dimer</i> and <i>p-dimer</i> ..... | 6 |
| 6. Coordinates of the Optimized Geometries .....                                          | 7 |

## 1. DFT-calculated ground state of *o*-/*m*-/*p*-dimer

Figure S1 shows the optimized ground-state geometry for *o*-dimer, *m*-dimer and *p*-dimer. Table S1 shows the distance between the centers of the two chromophores.

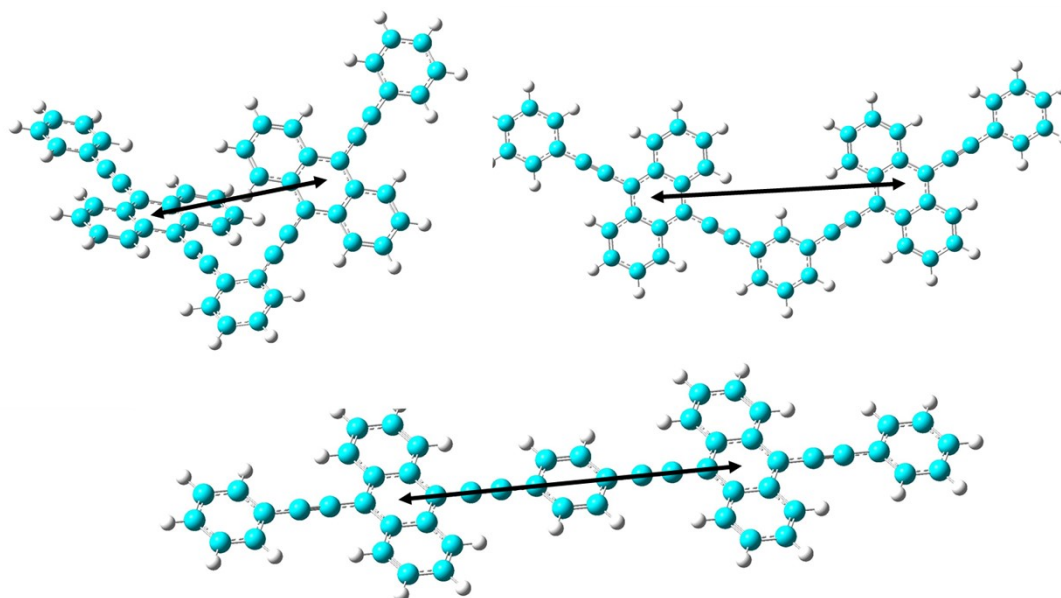

**Figure S1.** Optimized ground-state geometry for *o*-dimer, *m*-dimer and *p*-dimer.

**Table S1.** The distance between the centers of the two BPEA units in these three dimers.

|      | <i>o</i> -dimer | <i>m</i> -dimer | <i>p</i> -dimer |
|------|-----------------|-----------------|-----------------|
| d(Å) | 7.47            | 11.97           | 13.80           |

**Table S2.** The Davydov splitting energy of the three dimers calculated by the TD-DFT method.

|            | <i>o</i> -dimer | <i>m</i> -dimer | <i>p</i> -dimer |
|------------|-----------------|-----------------|-----------------|
| Energy(eV) | 0.2915          | 0.1644          | 0.3489          |

## 2. Fluorescence dynamic of *o*-/*m*-/*p*-monomer and *o*-/*m*-/*p*-dimer

The fluorescence lifetime of *o*-/*m*-/*p*-monomer and *o*-/*m*-/*p*-dimer in different solvents and PS film are shown in Figure S2. The lifetime of fluorescence and fluorescence quantum yield of *o*-/*m*-/*p*-monomer in THF and PS film are shown in the Table S2.

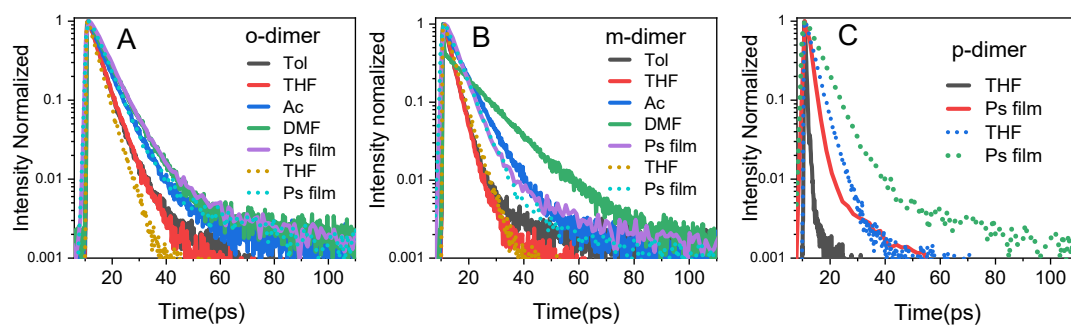

**Figure S2.** Time-resolved fluorescence decay of *o*-dimer (A), *m*-dimer (B) and *p*-dimer (C) as well as their corresponding monomers. The excitation wavelength is 440 nm. The monitored wavelength is the maximum fluorescence peak.

**Table S3.** fluorescence parameters of *o*-monomer, *m*-monomer and *p*-monomer in THF and PS film.

|         | <i>o</i> -monomer |             | <i>m</i> -monomer |             | <i>p</i> -monomer |             |
|---------|-------------------|-------------|-------------------|-------------|-------------------|-------------|
|         | $\Phi_F$ (%)      | $\tau$ (ns) | $\Phi_F$ (%)      | $\tau$ (ns) | $\Phi_F$ (%)      | $\tau$ (ns) |
| THF     | 100               | 3.68        | 100               | 3.45        | 100               | 3.11        |
| Ps film | 100               | 5.17        | 100               | 4.75        | 100               | 6.08        |

### 3. Femtosecond transient absorption spectra of *o*-/*m*-/*p*-monomer in THF

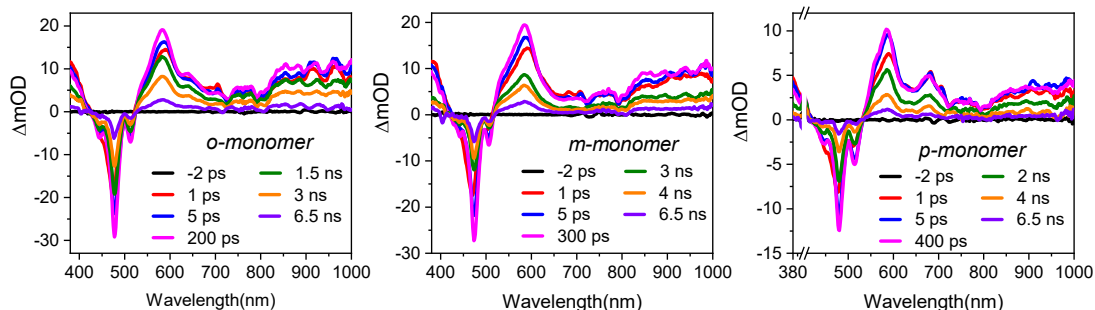

**Figure S3.** Femtosecond transient absorption spectra of *o*-monomer (A), *m*-monomer (B), *p*-monomer (C) in THF following the excitation at 400 nm.

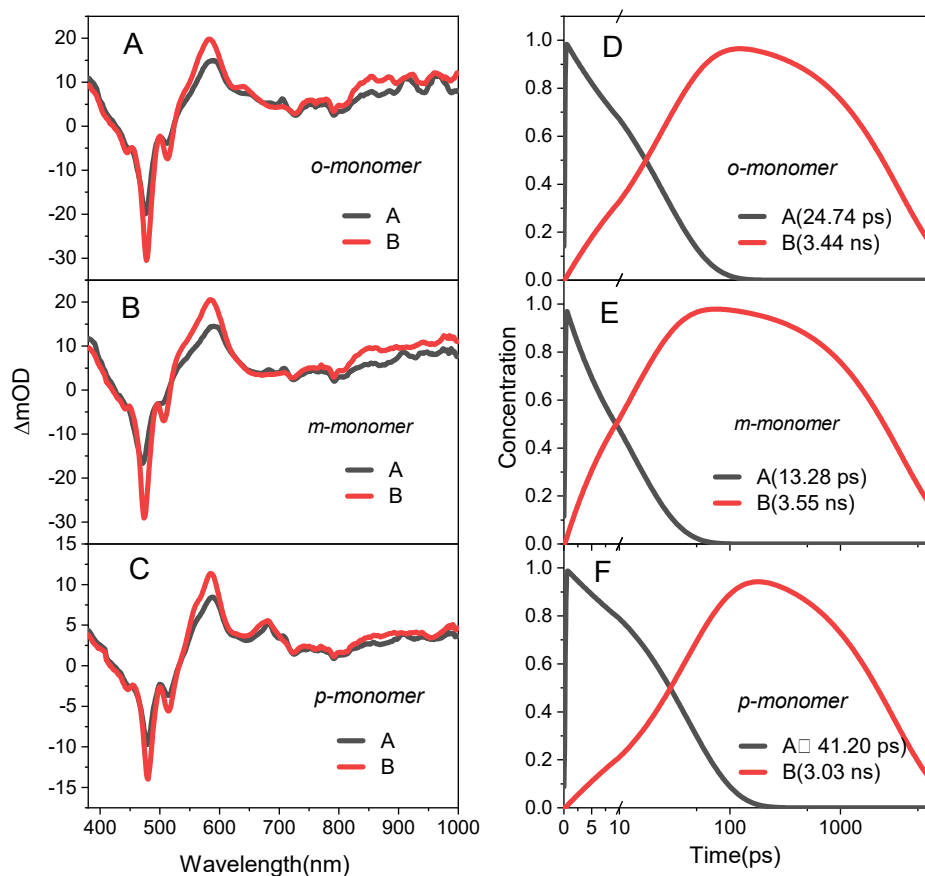

**Figure S4.** EADSs from global analysis and concentrations of transient species for *o*-monomer (A, D), *m*-monomer (B, E) and *p*-monomer (C, F) in THF.

#### 4. Absorption spectra of dimer<sup>+</sup> and dimer<sup>-</sup>

To produce the cation and anion of BPEA derivatives, electron transfer experiment was conducted by adding the reductant *N,N*-dimethylaniline (DMA) or oxidant tetracyanoethylene (TCNE) to the acetone solution of *o*-monomer, *m*-dimer and *p*-dimer.<sup>1</sup> The electron transfer process was measured by femtosecond (A-C) and nanosecond transient absorption (D-E) spectra (Figure S5).

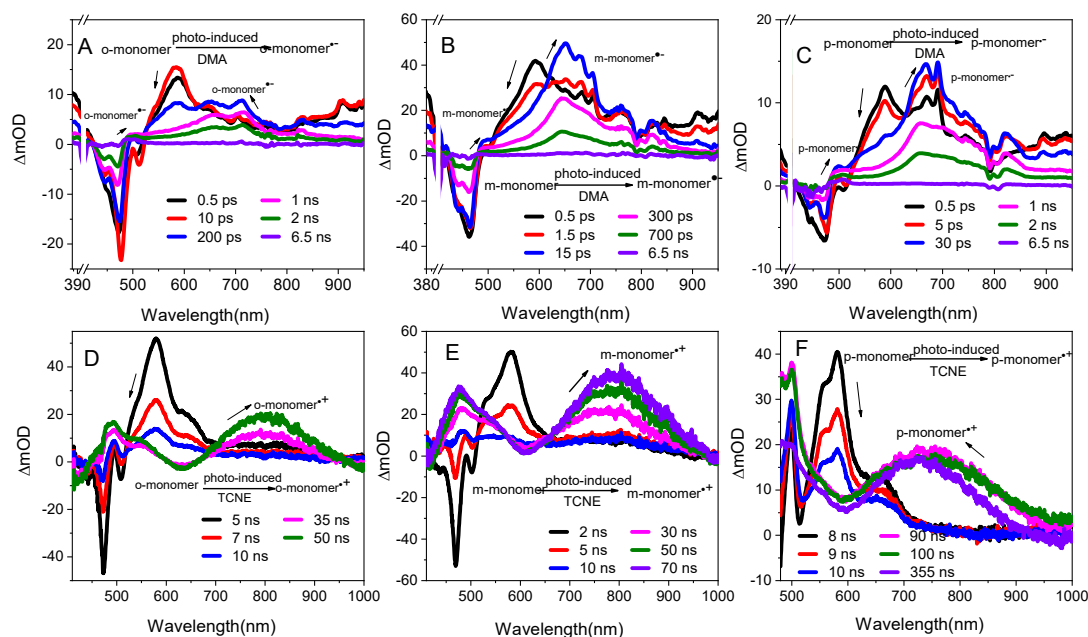

**Figure S5.** Absorption spectra of anion (*o*-/*m*-/*p*-monomer<sup>-</sup>) and cation (*o*-/*m*-/*p*-monomer<sup>+</sup>) in acetone.

As shown in Figure S5A, with the increase of the time, the singlet absorption band at 580 nm was decreased in *o*-monomer, accompanied by the rise of two new bands at ~650 and ~710 nm. Similarly, as the singlet state absorption intensity decreased in *m*-monomer and *p*-monomer (Figure S5B-S5C), a broad absorption band from 500 nm to 800 nm was emerged, with the band at ~660 nm as the main peak. These new bands are close to the anion of EBPEA derivatives based on the previous report.<sup>2</sup> So these new bands were ascribed to the anion of BPEA derivatives. When the oxidant tetracyanoethylene (TCNE) was added, two new broad bands (414-600 nm and 617-1000 nm) were observed, which was ascribed to the cation of BPEA derivatives.

## 5. Single-wavelength dynamics of *o*-dimer, *m*-dimer and *p*-dimer

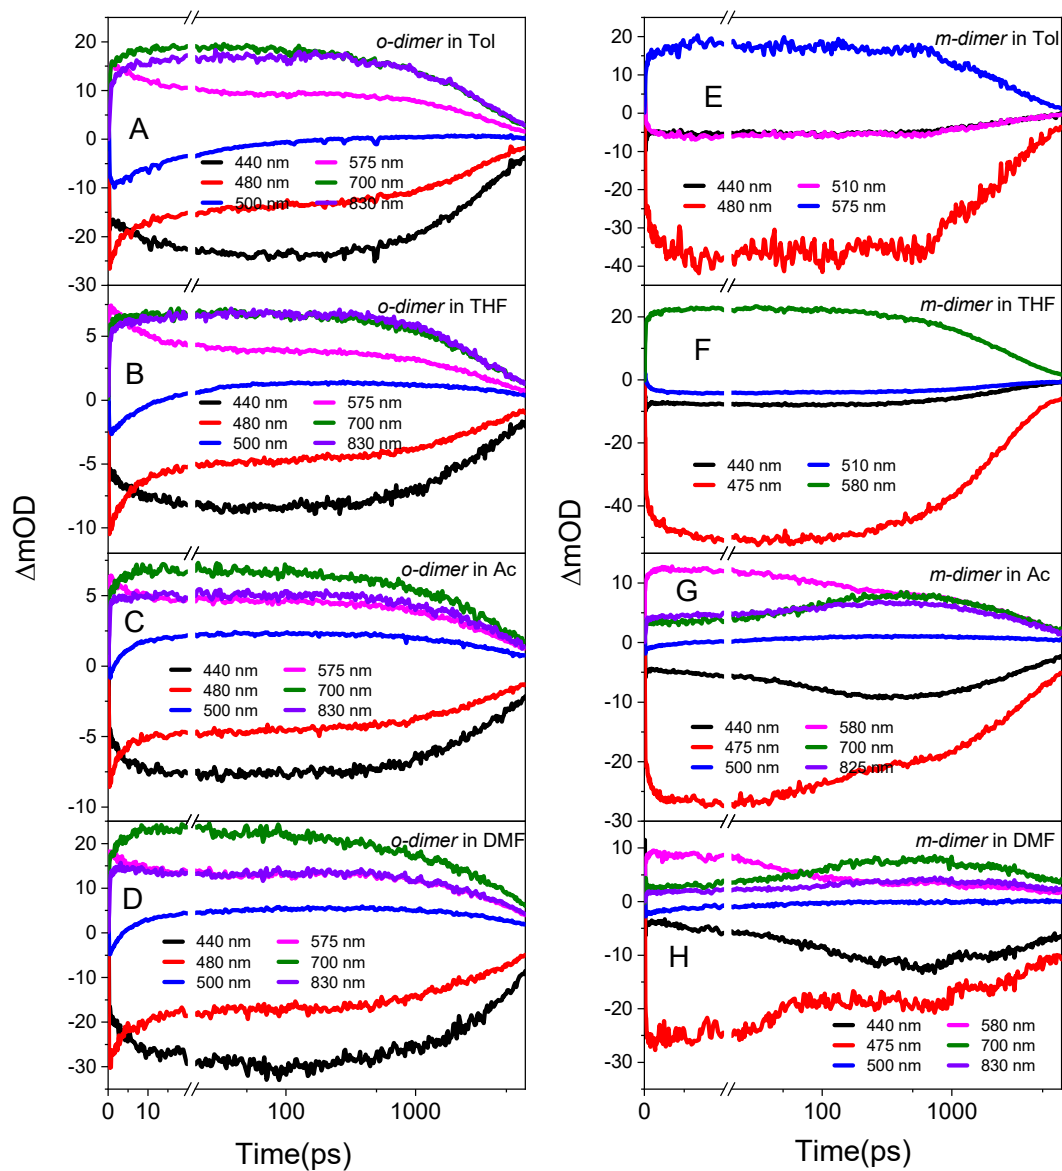

**Figure S6.** Single-wavelength dynamics probed at different wavelengths for *o*-dimer (A-C) and *m*-dimer (E-H) in Tol, THF, Ac, and DMF.

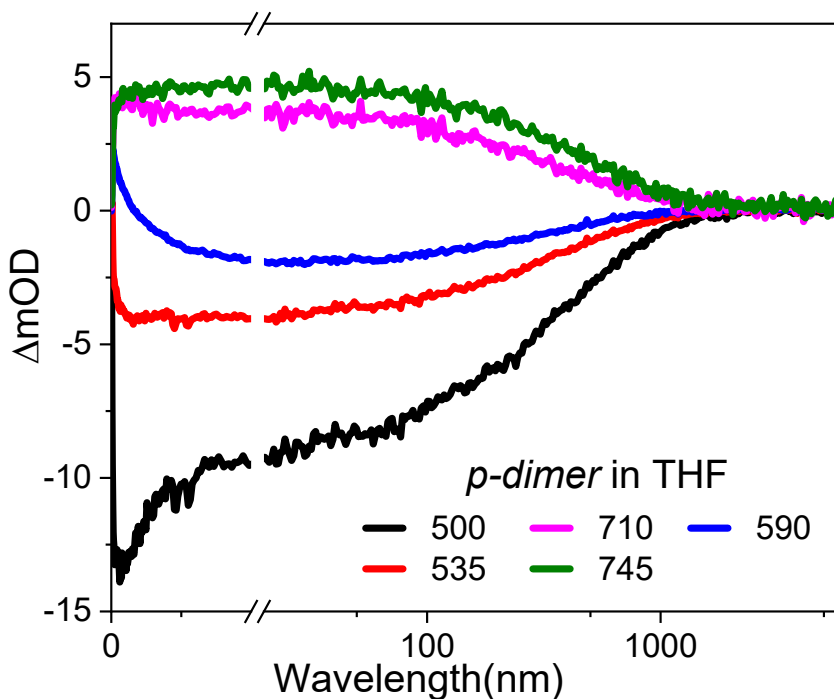

**Figure S7.** Single-wavelength dynamics probed at different wavelengths for *p-dimer* in THF.

## 6. Coordinates of the Optimized Geometries

Table S4. Geometry-optimized atomic coordinates for o-dimer.

There were zero imaginary frequencies

| Atom Type | X           | Y          | Z           |
|-----------|-------------|------------|-------------|
| 0 1       |             |            |             |
| C         | -0.69858300 | 7.67710500 | -0.03377200 |
| C         | 0.69899000  | 7.67709900 | 0.03357200  |
| C         | 1.39298500  | 6.47304900 | 0.06210600  |
| C         | 0.71287400  | 5.23984800 | 0.02589400  |
| C         | -0.71249300 | 5.23985600 | -0.02584200 |
| C         | -1.39259100 | 6.47305800 | -0.06219100 |
| H         | -1.24525800 | 8.61543200 | -0.05911500 |
| H         | 1.24567600  | 8.61542200 | 0.05881400  |
| H         | 2.47778600  | 6.46560400 | 0.10132900  |
| H         | -2.47739100 | 6.46561700 | -0.10142900 |
| C         | 1.45408300  | 4.02753000 | 0.01789900  |
| C         | -1.45373800 | 4.02755200 | -0.01777200 |
| C         | 2.13424400  | 3.01619600 | -0.02440300 |
| C         | -2.13396200 | 3.01626400 | 0.02458700  |
| C         | 2.92611600  | 1.84073500 | -0.09179900 |
| C         | 2.44363200  | 0.69994600 | -0.79305700 |

|   |             |             |             |
|---|-------------|-------------|-------------|
| C | 4.20545600  | 1.81218400  | 0.53143300  |
| C | 1.16969100  | 0.70200700  | -1.43609400 |
| C | 3.25277600  | -0.48662600 | -0.87113000 |
| C | 5.01372000  | 0.62571400  | 0.45358500  |
| C | 4.71471700  | 2.93806200  | 1.24492400  |
| C | 0.71561600  | -0.40038900 | -2.11321400 |
| H | 0.56204500  | 1.59839300  | -1.37608400 |
| C | 2.74339600  | -1.61219300 | -1.58451200 |
| C | 4.53177000  | -0.51631900 | -0.24667000 |
| C | 6.29092100  | 0.62868100  | 1.08948600  |
| H | 4.09838000  | 3.82874000  | 1.30570800  |
| C | 5.94791700  | 2.90272600  | 1.84321800  |
| C | 1.51286300  | -1.57325300 | -2.18799000 |
| H | -0.25936400 | -0.37872200 | -2.59161200 |
| H | 3.35686600  | -2.50501800 | -1.63996200 |
| C | 6.74772000  | 1.73162900  | 1.76386700  |
| H | 6.89686800  | -0.26880700 | 1.02671100  |
| H | 6.31578100  | 3.77182500  | 2.38177600  |
| H | 1.14399900  | -2.44215100 | -2.72616400 |
| H | 7.72381200  | 1.71159100  | 2.24084200  |
| C | -2.92592700 | 1.84085800  | 0.09194400  |
| C | -2.44377400 | 0.70018100  | 0.79360700  |
| C | -4.20505800 | 1.81227600  | -0.53171700 |
| C | -1.17008100 | 0.70230000  | 1.43713600  |
| C | -3.25302200 | -0.48632500 | 0.87161800  |
| C | -5.01342700 | 0.62587200  | -0.45392600 |
| C | -4.71400400 | 2.93805600  | -1.24558900 |
| C | -0.71633100 | -0.39998600 | 2.11465400  |
| H | -0.56235600 | 1.59863400  | 1.37716300  |
| C | -2.74397200 | -1.61178300 | 1.58540700  |
| C | -4.53179600 | -0.51605700 | 0.24671400  |
| C | -6.29040600 | 0.62880100  | -1.09027300 |
| H | -4.09759800 | 3.82869000  | -1.30631700 |
| C | -5.94699800 | 2.90268600  | -1.84430600 |
| C | -1.51366700 | -1.57279300 | 2.18934800  |
| H | 0.25845500  | -0.37827800 | 2.59344600  |
| H | -3.35750700 | -2.50456700 | 1.64079200  |
| C | -6.74689900 | 1.73165100  | -1.76502100 |
| H | -6.89643000 | -0.26863800 | -1.02754300 |
| H | -6.31461900 | 3.77170900  | -2.38315200 |
| H | -1.14505300 | -2.44161000 | 2.72782300  |
| H | -7.72282400 | 1.71158300  | -2.24233700 |
| C | -5.32909100 | -1.68684700 | 0.32249300  |
| C | 5.32895500  | -1.68718100 | -0.32248900 |



|   |             |             |             |
|---|-------------|-------------|-------------|
| C | 6.01391400  | -2.69367800 | -0.38760300 |
| C | -6.01416700 | -2.69326700 | 0.38754300  |
| C | 6.81253600  | -3.86918100 | -0.46465400 |
| C | 6.35238500  | -5.00582800 | -1.16168100 |
| C | 8.07895900  | -3.91971100 | 0.15429100  |
| C | 7.13675500  | -6.15301400 | -1.23452500 |
| H | 5.37869400  | -4.97436200 | -1.64091900 |
| C | 8.85606400  | -5.07148000 | 0.07593500  |
| H | 8.43998100  | -3.04869700 | 0.69258700  |
| C | 8.38985000  | -6.19153100 | -0.61738800 |
| H | 6.76926900  | -7.02102900 | -1.77517800 |
| H | 9.82979900  | -5.09582200 | 0.55766100  |
| H | 8.99943400  | -7.08893900 | -0.67650200 |
| C | -6.81285000 | -3.86873500 | 0.46449200  |
| C | -8.07919900 | -3.91921000 | -0.15461000 |
| C | -6.35283700 | -5.00539800 | 1.16158200  |
| C | -8.85636400 | -5.07094600 | -0.07634900 |
| H | -8.44011900 | -3.04818000 | -0.69294800 |
| C | -7.13726600 | -6.15254800 | 1.23433100  |
| H | -5.37920500 | -4.97397200 | 1.64094200  |
| C | -8.39028400 | -6.19101400 | 0.61703500  |
| H | -9.83004000 | -5.09524600 | -0.55819600 |
| H | -6.76988600 | -7.02057800 | 1.77503300  |
| H | -8.99991300 | -7.08839600 | 0.67607600  |

Table S5. Geometry-optimized atomic coordinates for m-dimer.

There were zero imaginary frequencies

| Atom Type | X           | Y           | Z           |
|-----------|-------------|-------------|-------------|
| 0 1       |             |             |             |
| C         | 1.20992900  | 4.54496200  | -0.00003700 |
| C         | 0.00000600  | 5.23398700  | -0.00002700 |
| C         | -1.20991900 | 4.54496700  | -0.00001000 |
| C         | -1.22316200 | 3.13402200  | -0.00000200 |
| C         | 0.00000000  | 2.44114600  | -0.00001200 |
| C         | 1.22316600  | 3.13401700  | -0.00003000 |
| H         | 2.15155200  | 5.08459600  | -0.00005000 |
| H         | 0.00000800  | 6.32039600  | -0.00003300 |
| H         | -2.15154100 | 5.08460400  | -0.00000500 |
| H         | -0.00000100 | 1.35654500  | -0.00000500 |
| C         | 2.45583100  | 2.42169200  | -0.00004000 |
| C         | -2.45583100 | 2.42170300  | 0.00001200  |
| C         | -3.51422700 | 1.81703700  | 0.00001500  |
| C         | 3.51422800  | 1.81702800  | -0.00004300 |
| C         | 4.74600600  | 1.11334000  | -0.00004100 |
| C         | 4.75048200  | -0.31002800 | 0.00007100  |

|   |             |             |             |
|---|-------------|-------------|-------------|
| C | 5.97413900  | 1.83294700  | -0.00014700 |
| C | 3.53748200  | -1.06120000 | 0.00017200  |
| C | 5.99915400  | -1.02296800 | 0.00008200  |
| C | 7.22272700  | 1.11990000  | -0.00013000 |
| C | 6.00457800  | 3.25935400  | -0.00027200 |
| C | 3.54962500  | -2.43214300 | 0.00027500  |
| H | 2.59818600  | -0.51878000 | 0.00016500  |
| C | 5.96945800  | -2.44936900 | 0.00019000  |
| C | 7.22756700  | -0.30361500 | -0.00001200 |
| C | 8.43603500  | 1.87058000  | -0.00023300 |
| H | 5.05999500  | 3.79253400  | -0.00028800 |
| C | 7.19131600  | 3.94588800  | -0.00037100 |
| C | 4.78305400  | -3.13641700 | 0.00028300  |
| H | 2.61355200  | -2.98386600 | 0.00035100  |
| H | 6.91446800  | -2.98177500 | 0.00019500  |
| C | 8.42470200  | 3.24151800  | -0.00035000 |
| H | 9.37484900  | 1.32732700  | -0.00021600 |
| H | 7.19065400  | 5.03246400  | -0.00046500 |
| H | 4.78394700  | -4.22296800 | 0.00036300  |
| H | 9.36090500  | 3.79299700  | -0.00042700 |
| C | -4.74601200 | 1.11336000  | 0.00002400  |
| C | -4.75050300 | -0.31000800 | -0.00010800 |
| C | -5.97413700 | 1.83298000  | 0.00015900  |
| C | -3.53751400 | -1.06119700 | -0.00023600 |
| C | -5.99918300 | -1.02293200 | -0.00011600 |
| C | -7.22273500 | 1.11994800  | 0.00014600  |
| C | -6.00455800 | 3.25938800  | 0.00031000  |
| C | -3.54967500 | -2.43214000 | -0.00035800 |
| H | -2.59821000 | -0.51878900 | -0.00023300 |
| C | -5.96950900 | -2.44933300 | -0.00024500 |
| C | -7.22758900 | -0.30356800 | 0.00000400  |
| C | -8.43603300 | 1.87064600  | 0.00027500  |
| H | -5.05996800 | 3.79255500  | 0.00032400  |
| C | -7.19128600 | 3.94593800  | 0.00043500  |
| C | -4.78311400 | -3.13639700 | -0.00036100 |
| H | -2.61361000 | -2.98387500 | -0.00045300 |
| H | -6.91452700 | -2.98172600 | -0.00024600 |
| C | -8.42468100 | 3.24158400  | 0.00041600  |
| H | -9.37485400 | 1.32740700  | 0.00026000  |
| H | -7.19061000 | 5.03251300  | 0.00054900  |
| H | -4.78402200 | -4.22294900 | -0.00045600 |
| H | -9.36087700 | 3.79307500  | 0.00051500  |
| C | 8.45929900  | -1.00695100 | 0.00001100  |
| C | -8.45932200 | -1.00690100 | -0.00002100 |

|   |              |             |             |
|---|--------------|-------------|-------------|
| C | -9.51805100  | -1.61147200 | -0.00005200 |
| C | 9.51805700   | -1.61147200 | 0.00004000  |
| C | -10.75362200 | -2.31780900 | -0.00005900 |
| C | -11.97981900 | -1.62080500 | 0.00024500  |
| C | -10.77471200 | -3.72810300 | -0.00037700 |
| C | -13.18525000 | -2.31612700 | 0.00023100  |
| H | -11.97151100 | -0.53514000 | 0.00049200  |
| C | -11.98520000 | -4.41456200 | -0.00038800 |
| H | -9.83475300  | -4.27143200 | -0.00061600 |
| C | -13.19390200 | -3.71343500 | -0.00008600 |
| H | -14.12229600 | -1.76592600 | 0.00046800  |
| H | -11.98612200 | -5.50119200 | -0.00063500 |
| H | -14.13703200 | -4.25280300 | -0.00009700 |
| C | 10.75364000  | -2.31778700 | 0.00008000  |
| C | 10.77475700  | -3.72808100 | 0.00039200  |
| C | 11.97982300  | -1.62076000 | -0.00018800 |
| C | 11.98525800  | -4.41451700 | 0.00043300  |
| H | 9.83480800   | -4.27142800 | 0.00060200  |
| C | 13.18526800  | -2.31605900 | -0.00014300 |
| H | 11.97149500  | -0.53509500 | -0.00043000 |
| C | 13.19394600  | -3.71336700 | 0.00016800  |
| H | 11.98620000  | -5.50114700 | 0.00067400  |
| H | 14.12230300  | -1.76584000 | -0.00035200 |
| H | 14.13708600  | -4.25271700 | 0.00020200  |

Table S6. Geometry-optimized atomic coordinates for p-dimer.

There were zero imaginary frequencies

| Atom Type | X           | Y           | Z           |
|-----------|-------------|-------------|-------------|
| 0 1       |             |             |             |
| C         | 0.69269900  | 1.21287600  | -0.00024800 |
| C         | -0.69270600 | 1.21287300  | -0.00003500 |
| C         | -1.41701000 | 0.00004900  | 0.00007800  |
| C         | -0.69270100 | -1.21277300 | -0.00003100 |
| C         | 0.69270400  | -1.21277000 | -0.00024500 |
| C         | 1.41700900  | 0.00005500  | -0.00035600 |
| H         | 1.23538800  | 2.15303300  | -0.00033400 |
| H         | -1.23539800 | 2.15302800  | 0.00004800  |
| H         | -1.23539100 | -2.15292900 | 0.00005500  |
| H         | 1.23539700  | -2.15292400 | -0.00032800 |
| C         | -2.83581000 | 0.00004400  | 0.00030200  |
| C         | -4.05604900 | 0.00003300  | 0.00049300  |
| C         | 2.83580800  | 0.00005700  | -0.00058100 |
| C         | 4.05604800  | 0.00005100  | -0.00077000 |
| C         | -5.47266000 | 0.00002200  | 0.00039200  |
| C         | -6.18328800 | 1.23434500  | 0.00033500  |

|   |              |             |             |
|---|--------------|-------------|-------------|
| C | -6.18326800  | -1.23431300 | 0.00036300  |
| C | -5.50267900  | 2.48790400  | 0.00036100  |
| C | -7.62089500  | 1.23398300  | 0.00024800  |
| C | -7.62087500  | -1.23397300 | 0.00027800  |
| C | -5.50263900  | -2.48786100 | 0.00041800  |
| C | -6.19307300  | 3.67262700  | 0.00030300  |
| H | -4.41801100  | 2.48263300  | 0.00042600  |
| C | -8.30265700  | 2.48721100  | 0.00019100  |
| C | -8.33115300  | -0.00000100 | 0.00022200  |
| C | -8.30261700  | -2.48721200 | 0.00025100  |
| H | -4.41797100  | -2.48257300 | 0.00048200  |
| C | -6.19301400  | -3.67259500 | 0.00038900  |
| C | -7.61323400  | 3.67235900  | 0.00021700  |
| H | -5.65373400  | 4.61589200  | 0.00032300  |
| H | -9.38729700  | 2.48057700  | 0.00012500  |
| C | -7.61317500  | -3.67235000 | 0.00030500  |
| H | -9.38725800  | -2.48059500 | 0.00018700  |
| H | -5.65366000  | -4.61585100 | 0.00043100  |
| H | -8.15299400  | 4.61536400  | 0.00017100  |
| H | -8.15292100  | -4.61536300 | 0.00028200  |
| C | 5.47266000   | 0.00003600  | -0.00058300 |
| C | 6.18326500   | -1.23430100 | -0.00050800 |
| C | 6.18329200   | 1.23435700  | -0.00048000 |
| C | 5.50263200   | -2.48784700 | -0.00061300 |
| C | 7.62087200   | -1.23396600 | -0.00032300 |
| C | 7.62089900   | 1.23399000  | -0.00029300 |
| C | 5.50268700   | 2.48791800  | -0.00055600 |
| C | 6.19300400   | -3.67258400 | -0.00054200 |
| H | 4.41796400   | -2.48255600 | -0.00075300 |
| C | 8.30261000   | -2.48720700 | -0.00025300 |
| C | 8.33115300   | 0.00000400  | -0.00021300 |
| C | 8.30266500   | 2.48721600  | -0.00019400 |
| H | 4.41801900   | 2.48265100  | -0.00069700 |
| C | 6.19308500   | 3.67263900  | -0.00045700 |
| C | 7.61316500   | -3.67234200 | -0.00036000 |
| H | 5.65364800   | -4.61583800 | -0.00062600 |
| H | 9.38725100   | -2.48059200 | -0.00011400 |
| C | 7.61324500   | 3.67236700  | -0.00027300 |
| H | 9.38730500   | 2.48057800  | -0.00005300 |
| H | 5.65374900   | 4.61590500  | -0.00052000 |
| H | 8.15290800   | -4.61535700 | -0.00030500 |
| H | 8.15300900   | 4.61537000  | -0.00019600 |
| C | -9.74921300  | -0.00001400 | 0.00014700  |
| C | -10.96847800 | -0.00002700 | 0.00009100  |

|   |              |             |             |
|---|--------------|-------------|-------------|
| C | 9.74921300   | -0.00001200 | -0.00002400 |
| C | 10.96847800  | -0.00002800 | 0.00014400  |
| C | 12.39156600  | -0.00005100 | 0.00037300  |
| C | 13.11013800  | 1.21370900  | 0.00049300  |
| C | 13.11009800  | -1.21383300 | 0.00048300  |
| C | 14.50169600  | 1.20855700  | 0.00071500  |
| H | 12.56404900  | 2.15208200  | 0.00040800  |
| C | 14.50165700  | -1.20872700 | 0.00070600  |
| H | 12.56397900  | -2.15218800 | 0.00039200  |
| C | 15.20292700  | -0.00009600 | 0.00082300  |
| H | 15.04196600  | 2.15136100  | 0.00080500  |
| H | 15.04189600  | -2.15154800 | 0.00078900  |
| H | 16.28938700  | -0.00011400 | 0.00099700  |
| C | -12.39156600 | -0.00004200 | -0.00006400 |
| C | -13.11013300 | 1.21372000  | -0.00014300 |
| C | -13.11010400 | -1.21382200 | -0.00014000 |
| C | -14.50169100 | 1.20857500  | -0.00029200 |
| H | -12.56403900 | 2.15209100  | -0.00008400 |
| C | -14.50166300 | -1.20870900 | -0.00028900 |
| H | -12.56398900 | -2.15217900 | -0.00008000 |
| C | -15.20292800 | -0.00007600 | -0.00036600 |
| H | -15.04195700 | 2.15138100  | -0.00035100 |
| H | -15.04190600 | -2.15152900 | -0.00034500 |
| H | -16.28938800 | -0.00008800 | -0.00048300 |

## Reference

1. Guo, Y. Y.; Ma, Z. T.; Niu, X. M.; Zhang, W.; Tao, M.; Guo, Q. J.; Wang, Z. H.; Xia, A. D., Bridge-Mediated Charge Separation in Isomeric N-Annulated Perylene Diimide Dimers. *J Am Chem Soc* **2019**, *141* (32), 12789-12796.
2. Ricks, A. B.; Solomon, G. C.; Colvin, M. T.; Scott, A. M.; Chen, K.; Ratner, M. A.; Wasielewski, M. R., Controlling Electron Transfer in Donor-Bridge-Acceptor Molecules Using Cross-Conjugated Bridges. *J Am Chem Soc* **2010**, *132* (43), 15427-15434.
